# Supplementary material for: Predicting Compressive Strength and Hydration Products of Calcium Aluminate Cement Using Data-Driven Approach
Source: MDPI journal article supplement (doi:10.3390/ma16020654), 2023-01-09
Supplement: s1 [file s1]

**Predicting Compressive Strength and Hydration Products of Calcium Aluminate Cement Using  
Data-driven Approach**

Sai Akshay Ponduru<sup>1</sup>, Taihao Han<sup>1</sup>, Jie Huang<sup>2</sup>, and Aditya Kumar<sup>1\*</sup>

1. Department of Materials Science and Engineering, Missouri University of Science and Technology, Rolla, MO, USA 65409
2. Department of Electrical and Computer Engineering, Missouri University of Science and Technology, Rolla, MO, USA 65409

**\*Corresponding Author**

Aditya Kumar

Associate Professor, Department of Materials Science and Engineering

Missouri University of Science and Technology

B49 McNutt Hall, 1400 N Bishop, Rolla, MO 65409

Email: kumarad@mst.edu; Phone: 573-341-6994; Fax: 573-341-6934

**Table S1** presents the compressive strength, porosity,  $C_4AH_{19}$  content, straetlingite content, gibbsite content, and solid content in relation to mixture design and cement age.

| <b>Table S1:</b> Mixture design detail of calcium aluminate cement corresponding to compressive strength, porosity, $C_4AH_{19}$ content, straetlingite content, gibbsite content, and solid content. |                   |                                         |                                       |                            |                                         |                                          |                                           |                                      |                                   |
|-------------------------------------------------------------------------------------------------------------------------------------------------------------------------------------------------------|-------------------|-----------------------------------------|---------------------------------------|----------------------------|-----------------------------------------|------------------------------------------|-------------------------------------------|--------------------------------------|-----------------------------------|
| Water-to-Cement Ratio (Unitless)                                                                                                                                                                      | Cement Age (Hour) | $Li_2CO_3$ Content (% <sub>mass</sub> ) | Measured Porosity (% <sub>vol</sub> ) | Compressive Strength (MPa) | Calculated Porosity (% <sub>vol</sub> ) | $C_4AH_{19}$ Content (% <sub>vol</sub> ) | Straetlingite Content (% <sub>vol</sub> ) | Gibbsite Content (% <sub>vol</sub> ) | Solid Content (% <sub>vol</sub> ) |
| 0.2                                                                                                                                                                                                   | 1                 | 0                                       | 37.87                                 | 0                          | 37.8624                                 | 0.798913                                 | 0.095486                                  | 0.172519                             | 62.1376                           |
| 0.2                                                                                                                                                                                                   | 2                 | 0                                       | 37.93                                 | 0                          | 37.9256                                 | 0.738643                                 | 0.088648                                  | 0.160558                             | 62.0744                           |
| 0.2                                                                                                                                                                                                   | 3                 | 0                                       | 37.27                                 | 0.9                        | 37.29242                                | 1.342385                                 | 0.157145                                  | 0.280374                             | 62.70758                          |
| 0.2                                                                                                                                                                                                   | 4                 | 0                                       | 35.84                                 | 1.3                        | 35.82675                                | 2.739904                                 | 0.3157                                    | 0.55772                              | 64.17325                          |
| 0.2                                                                                                                                                                                                   | 5                 | 0                                       | 30.75                                 | 8.6                        | 30.75708                                | 7.573852                                 | 0.864131                                  | 1.517047                             | 69.24292                          |
| 0.2                                                                                                                                                                                                   | 6                 | 0                                       | 20.1                                  | 14.1                       | 20.13428                                | 17.70273                                 | 2.013295                                  | 3.527186                             | 79.86572                          |
| 0.2                                                                                                                                                                                                   | 7                 | 0                                       | 12.92                                 | 25.3                       | 12.88896                                | 24.61117                                 | 2.797086                                  | 4.898209                             | 87.11104                          |
| 0.2                                                                                                                                                                                                   | 8                 | 0                                       | 10.47                                 | 32.5                       | 10.45522                                | 26.93175                                 | 3.060365                                  | 5.358742                             | 89.54478                          |
| 0.2                                                                                                                                                                                                   | 9                 | 0                                       | 10.09                                 | 43.8                       | 10.08353                                | 27.28616                                 | 3.100574                                  | 5.429076                             | 89.91647                          |
| 0.2                                                                                                                                                                                                   | 24                | 0                                       | 7.49                                  | 57.5                       | 7.459741                                | 29.78795                                 | 3.384413                                  | 5.925573                             | 92.54026                          |
| 0.2                                                                                                                                                                                                   | 72                | 0                                       | 6.36                                  | 61.5                       | 6.323343                                | 30.87151                                 | 3.507347                                  | 6.140612                             | 93.67666                          |
| 0.2                                                                                                                                                                                                   | 168               | 0                                       | 3.84                                  | 64.5                       | 3.874714                                | 33.20629                                 | 3.772237                                  | 6.603963                             | 96.12529                          |
| 0.2                                                                                                                                                                                                   | 1                 | 0.001                                   | 34.61                                 | 0                          | 34.60606                                | 3.903842                                 | 0.447753                                  | 0.788711                             | 65.39394                          |
| 0.2                                                                                                                                                                                                   | 2                 | 0.001                                   | 33.45                                 | 0.3                        | 33.44123                                | 5.014513                                 | 0.573763                                  | 1.009131                             | 66.55877                          |
| 0.2                                                                                                                                                                                                   | 3                 | 0.001                                   | 28.35                                 | 0.6                        | 28.36418                                | 9.855494                                 | 1.122993                                  | 1.969853                             | 71.63582                          |
| 0.2                                                                                                                                                                                                   | 4                 | 0.001                                   | 24.23                                 | 2.5                        | 24.23035                                | 13.79712                                 | 1.570186                                  | 2.752093                             | 75.76965                          |
| 0.2                                                                                                                                                                                                   | 5                 | 0.001                                   | 15.4                                  | 11                         | 15.43394                                | 22.18452                                 | 2.521772                                  | 4.416626                             | 84.56606                          |
| 0.2                                                                                                                                                                                                   | 6                 | 0.001                                   | 14.94                                 | 28.8                       | 14.92789                                | 22.66704                                 | 2.576516                                  | 4.512385                             | 85.07211                          |
| 0.2                                                                                                                                                                                                   | 24                | 0.001                                   | 12.34                                 | 40                         | 12.37551                                | 25.10075                                 | 2.85263                                   | 4.995369                             | 87.62449                          |
| 0.2                                                                                                                                                                                                   | 72                | 0.001                                   | 9.94                                  | 47.9                       | 9.934641                                | 27.42813                                 | 3.116681                                  | 5.457251                             | 90.06536                          |
| 0.2                                                                                                                                                                                                   | 168               | 0.001                                   | 7.39                                  | 56.6                       | 7.384206                                | 29.85998                                 | 3.392584                                  | 5.939867                             | 92.61579                          |
| 0.2                                                                                                                                                                                                   | 1                 | 0.003                                   | 37.2                                  | 0.3                        | 37.22897                                | 1.402888                                 | 0.16401                                   | 0.292381                             | 62.77103                          |
| 0.2                                                                                                                                                                                                   | 2                 | 0.003                                   | 34.94                                 | 0.4                        | 34.92817                                | 3.596706                                 | 0.412907                                  | 0.727758                             | 65.07183                          |
| 0.2                                                                                                                                                                                                   | 3                 | 0.003                                   | 34.56                                 | 1.9                        | 34.54156                                | 3.965341                                 | 0.45473                                   | 0.800916                             | 65.45844                          |
| 0.2                                                                                                                                                                                                   | 4                 | 0.003                                   | 19.53                                 | 19.4                       | 19.50078                                | 18.30677                                 | 2.081826                                  | 3.647062                             | 80.49922                          |
| 0.2                                                                                                                                                                                                   | 5                 | 0.003                                   | 14.17                                 | 35.3                       | 14.20242                                | 23.35879                                 | 2.654997                                  | 4.649665                             | 85.79758                          |
| 0.2                                                                                                                                                                                                   | 6                 | 0.003                                   | 13.52                                 | 46.8                       | 13.54692                                | 23.98381                                 | 2.725909                                  | 4.773705                             | 86.45308                          |
| 0.2                                                                                                                                                                                                   | 24                | 0.003                                   | 10.47                                 | 59.9                       | 10.52947                                | 26.86096                                 | 3.052333                                  | 5.344693                             | 89.47053                          |
| 0.2                                                                                                                                                                                                   | 72                | 0.003                                   | 9.46                                  | 66.8                       | 9.487212                                | 27.85475                                 | 3.165083                                  | 5.541917                             | 90.51279                          |
| 0.2                                                                                                                                                                                                   | 168               | 0.003                                   | 6.69                                  | 73.6                       | 6.702945                                | 30.50956                                 | 3.466282                                  | 6.068781                             | 93.29706                          |
| 0.2                                                                                                                                                                                                   | 1                 | 0.005                                   | 35.69                                 | 0.9                        | 35.69869                                | 2.862019                                 | 0.329554                                  | 0.581955                             | 64.30131                          |
| 0.2                                                                                                                                                                                                   | 2                 | 0.005                                   | 34.15                                 | 2.8                        | 34.15404                                | 4.334841                                 | 0.496652                                  | 0.874245                             | 65.84596                          |
| 0.2                                                                                                                                                                                                   | 3                 | 0.005                                   | 22.52                                 | 11.8                       | 22.50667                                | 15.44065                                 | 1.756652                                  | 3.078263                             | 77.49333                          |
| 0.2                                                                                                                                                                                                   | 4                 | 0.005                                   | 15.52                                 | 22.9                       | 15.50611                                | 22.11571                                 | 2.513965                                  | 4.402968                             | 84.49389                          |

Prepared for submission to Materials (Supplementary Information)

|      |     |       |       |      |          |          |          |          |          |
|------|-----|-------|-------|------|----------|----------|----------|----------|----------|
| 0.2  | 5   | 0.005 | 13.48 | 50.1 | 13.40092 | 24.12302 | 2.741703 | 4.801332 | 86.59908 |
| 0.2  | 6   | 0.005 | 10.33 | 68.7 | 10.30664 | 27.07342 | 3.076438 | 5.386858 | 89.69336 |
| 0.2  | 24  | 0.005 | 8.55  | 72.1 | 8.58896  | 28.71124 | 3.262255 | 5.711892 | 91.41104 |
| 0.2  | 72  | 0.005 | 6.59  | 74.5 | 6.627089 | 30.58189 | 3.474488 | 6.083135 | 93.37291 |
| 0.2  | 168 | 0.005 | 4.65  | 76.1 | 4.643495 | 32.47325 | 3.689071 | 6.458488 | 95.35651 |
| 0.2  | 1   | 0.007 | 32.5  | 1.3  | 32.52955 | 5.883798 | 0.672387 | 1.181646 | 67.47045 |
| 0.2  | 2   | 0.007 | 31.27 | 4.8  | 31.28423 | 7.071219 | 0.807105 | 1.417297 | 68.71577 |
| 0.2  | 3   | 0.007 | 21.61 | 14.8 | 21.60344 | 16.30188 | 1.854362 | 3.249179 | 78.39656 |
| 0.2  | 4   | 0.007 | 16.56 | 25.3 | 16.58515 | 21.08684 | 2.397236 | 4.198785 | 83.41485 |
| 0.2  | 5   | 0.007 | 12.73 | 46.4 | 12.74241 | 24.75091 | 2.812939 | 4.92594  | 87.25759 |
| 0.2  | 6   | 0.007 | 10.31 | 62.4 | 10.38095 | 27.00257 | 3.0684   | 5.372797 | 89.61905 |
| 0.2  | 24  | 0.007 | 8.12  | 72.1 | 8.13813  | 29.14111 | 3.311025 | 5.797203 | 91.86187 |
| 0.2  | 72  | 0.007 | 6.73  | 74.5 | 6.778768 | 30.43726 | 3.45808  | 6.054433 | 93.22123 |
| 0.2  | 168 | 0.007 | 5.61  | 76.1 | 5.638029 | 31.52496 | 3.581484 | 6.270293 | 94.36197 |
| 0.2  | 1   | 0.01  | 34.11 | 1.6  | 34.08937 | 4.396508 | 0.503648 | 0.886484 | 65.91063 |
| 0.2  | 2   | 0.01  | 24.38 | 12   | 24.36749 | 13.66635 | 1.55535  | 2.726141 | 75.63251 |
| 0.2  | 3   | 0.01  | 16.25 | 26   | 16.22621 | 21.42909 | 2.436065 | 4.266706 | 83.77379 |
| 0.2  | 4   | 0.01  | 13.35 | 33.9 | 13.32787 | 24.19267 | 2.749605 | 4.815155 | 86.67213 |
| 0.2  | 5   | 0.01  | 12.35 | 42.5 | 12.30204 | 25.17081 | 2.860579 | 5.009272 | 87.69796 |
| 0.2  | 6   | 0.01  | 10.6  | 45.8 | 10.60368 | 26.7902  | 3.044305 | 5.33065  | 89.39632 |
| 0.2  | 24  | 0.01  | 8.83  | 64.8 | 8.813949 | 28.49671 | 3.237916 | 5.669318 | 91.18605 |
| 0.2  | 72  | 0.01  | 6.79  | 72.2 | 6.85456  | 30.36499 | 3.449881 | 6.040091 | 93.14544 |
| 0.2  | 168 | 0.01  | 6.49  | 74.6 | 6.47528  | 30.72664 | 3.490911 | 6.111861 | 93.52472 |
| 0.25 | 1   | 0     | 41.86 | 0    | 41.88702 | 2.153362 | 0.249836 | 0.443283 | 58.11298 |
| 0.25 | 2   | 0     | 41.13 | 0    | 41.14195 | 2.875766 | 0.331797 | 0.586653 | 58.85805 |
| 0.25 | 3   | 0     | 40.9  | 0    | 40.912   | 3.098715 | 0.357092 | 0.6309   | 59.088   |
| 0.25 | 4   | 0     | 37.9  | 0.9  | 37.89272 | 6.026137 | 0.689227 | 1.211883 | 62.10728 |
| 0.25 | 5   | 0     | 33.72 | 5.4  | 33.73832 | 10.05414 | 1.146229 | 2.011292 | 66.26168 |
| 0.25 | 6   | 0     | 25.43 | 17   | 25.42071 | 18.11869 | 2.061204 | 3.611802 | 74.57929 |
| 0.25 | 7   | 0     | 15.53 | 36.9 | 15.54114 | 27.69768 | 3.148    | 5.512871 | 84.45886 |
| 0.25 | 8   | 0     | 13.4  | 44.4 | 13.38752 | 29.78578 | 3.384909 | 5.927281 | 86.61248 |
| 0.25 | 9   | 0     | 11.91 | 54.2 | 11.89143 | 31.23635 | 3.549484 | 6.215164 | 88.10857 |
| 0.25 | 24  | 0     | 8.86  | 58.9 | 8.860734 | 34.17484 | 3.882875 | 6.798344 | 91.13927 |
| 0.25 | 72  | 0     | 8.55  | 66.7 | 8.582634 | 34.44448 | 3.913467 | 6.851857 | 91.41737 |
| 0.25 | 168 | 0     | 9.16  | 68.9 | 9.1384   | 33.90562 | 3.85233  | 6.744914 | 90.8616  |
| 0.25 | 1   | 0.001 | 40.17 | 0    | 40.16242 | 3.825491 | 0.439549 | 0.775138 | 59.83758 |
| 0.25 | 2   | 0.001 | 39.7  | 0    | 39.69941 | 4.274412 | 0.490482 | 0.864232 | 60.30059 |
| 0.25 | 3   | 0.001 | 31.44 | 0.8  | 31.43856 | 12.28393 | 1.399213 | 2.45382  | 68.56144 |
| 0.25 | 4   | 0.001 | 22.37 | 12.1 | 22.36175 | 21.08458 | 2.397703 | 4.20042  | 77.63825 |
| 0.25 | 5   | 0.001 | 17.21 | 31   | 17.20539 | 26.08406 | 2.964925 | 5.192629 | 82.79461 |
| 0.25 | 6   | 0.001 | 15.11 | 48.9 | 15.13935 | 28.08725 | 3.192199 | 5.590186 | 84.86065 |

Prepared for submission to Materials (Supplementary Information)

|      |     |       |       |      |          |          |          |          |          |
|------|-----|-------|-------|------|----------|----------|----------|----------|----------|
| 0.25 | 24  | 0.001 | 8.89  | 68.8 | 8.930191 | 34.10749 | 3.875234 | 6.784979 | 91.06981 |
| 0.25 | 72  | 0.001 | 6.9   | 71.1 | 6.904867 | 36.0712  | 4.098029 | 7.174701 | 93.09513 |
| 0.25 | 168 | 0.001 | 6.36  | 74   | 6.342095 | 36.61685 | 4.159936 | 7.282992 | 93.65791 |
| 0.25 | 1   | 0.003 | 39.11 | 0    | 39.11879 | 4.837366 | 0.554353 | 0.975957 | 60.88121 |
| 0.25 | 2   | 0.003 | 38.67 | 0    | 38.6528  | 5.289179 | 0.605614 | 1.065625 | 61.3472  |
| 0.25 | 3   | 0.003 | 32.06 | 0.9  | 32.04685 | 11.69415 | 1.332298 | 2.336771 | 67.95315 |
| 0.25 | 4   | 0.003 | 21.65 | 22.1 | 21.65296 | 21.77181 | 2.475673 | 4.336809 | 78.34704 |
| 0.25 | 5   | 0.003 | 20.54 | 25.4 | 20.55177 | 22.8395  | 2.596809 | 4.548705 | 79.44823 |
| 0.25 | 6   | 0.003 | 17.77 | 36.8 | 17.80064 | 25.50692 | 2.899445 | 5.078088 | 82.19936 |
| 0.25 | 24  | 0.003 | 9.84  | 60.1 | 9.830676 | 33.23441 | 3.776177 | 6.611704 | 90.16932 |
| 0.25 | 72  | 0.003 | 8.48  | 73.6 | 8.513041 | 34.51195 | 3.921123 | 6.865249 | 91.48696 |
| 0.25 | 168 | 0.003 | 7.82  | 77.3 | 7.815613 | 35.18816 | 3.997843 | 6.999451 | 92.18439 |
| 0.25 | 1   | 0.005 | 43.1  | 0.3  | 43.08338 | 0.993399 | 0.118231 | 0.213074 | 56.91662 |
| 0.25 | 2   | 0.005 | 35.39 | 2.7  | 35.41268 | 8.430722 | 0.962042 | 1.689103 | 64.58732 |
| 0.25 | 3   | 0.005 | 21.77 | 28.9 | 21.78205 | 21.64665 | 2.461473 | 4.311969 | 78.21795 |
| 0.25 | 4   | 0.005 | 16.05 | 32.1 | 16.07543 | 27.17964 | 3.089226 | 5.410061 | 83.92457 |
| 0.25 | 5   | 0.005 | 15.67 | 38.8 | 15.67487 | 27.56802 | 3.13329  | 5.487139 | 84.32513 |
| 0.25 | 6   | 0.005 | 15.19 | 40.4 | 15.20638 | 28.02226 | 3.184825 | 5.577288 | 84.79362 |
| 0.25 | 24  | 0.005 | 14.42 | 43.3 | 14.40032 | 28.80379 | 3.273495 | 5.732392 | 85.59968 |
| 0.25 | 72  | 0.005 | 13.01 | 47.4 | 12.98075 | 30.18017 | 3.429654 | 6.005552 | 87.01925 |
| 0.25 | 168 | 0.005 | 12.57 | 48   | 12.57305 | 30.57547 | 3.474504 | 6.084005 | 87.42695 |
| 0.25 | 1   | 0.007 | 40.84 | 1.2  | 40.79691 | 3.210309 | 0.369753 | 0.653047 | 59.20309 |
| 0.25 | 2   | 0.007 | 30.28 | 9.7  | 30.27667 | 13.41047 | 1.527026 | 2.677397 | 69.72333 |
| 0.25 | 3   | 0.007 | 18.64 | 22.7 | 18.65687 | 24.67675 | 2.805256 | 4.91333  | 81.34313 |
| 0.25 | 4   | 0.007 | 17.86 | 30.9 | 17.86666 | 25.44291 | 2.892183 | 5.065385 | 82.13334 |
| 0.25 | 5   | 0.007 | 17.57 | 38   | 17.60245 | 25.69908 | 2.921247 | 5.116225 | 82.39755 |
| 0.25 | 6   | 0.007 | 16.59 | 41.2 | 16.60809 | 26.66319 | 3.030631 | 5.307564 | 83.39191 |
| 0.25 | 24  | 0.007 | 15.02 | 44   | 15.00521 | 28.2173  | 3.206955 | 5.615997 | 84.99479 |
| 0.25 | 72  | 0.007 | 14.82 | 48.1 | 14.80382 | 28.41257 | 3.229109 | 5.654751 | 85.19618 |
| 0.25 | 168 | 0.007 | 9.42  | 67.7 | 9.415634 | 33.63682 | 3.821833 | 6.691568 | 90.58437 |
| 0.25 | 1   | 0.01  | 39.88 | 4.3  | 39.87319 | 4.105917 | 0.471365 | 0.830792 | 60.12681 |
| 0.25 | 2   | 0.01  | 31.94 | 9.4  | 31.92537 | 11.81193 | 1.345661 | 2.360146 | 68.07463 |
| 0.25 | 3   | 0.01  | 20.37 | 31.2 | 20.35671 | 23.02863 | 2.618267 | 4.58624  | 79.64329 |
| 0.25 | 4   | 0.01  | 14.48 | 40.3 | 14.46764 | 28.73852 | 3.26609  | 5.719439 | 85.53236 |
| 0.25 | 5   | 0.01  | 13.29 | 45.8 | 13.31979 | 29.85145 | 3.392359 | 5.940314 | 86.68021 |
| 0.25 | 6   | 0.01  | 12.64 | 50   | 12.64106 | 30.50952 | 3.467022 | 6.070917 | 87.35894 |
| 0.25 | 24  | 0.01  | 9.79  | 58.7 | 9.76157  | 33.30141 | 3.783779 | 6.625001 | 90.23843 |
| 0.25 | 72  | 0.01  | 9.36  | 71   | 9.346366 | 33.70398 | 3.829453 | 6.704897 | 90.65363 |
| 0.25 | 168 | 0.01  | 8.04  | 76.9 | 8.025128 | 34.98502 | 3.974795 | 6.959135 | 91.97487 |
| 0.3  | 1   | 0     | 47.34 | 0    | 47.35994 | 1.257822 | 0.148801 | 0.267194 | 52.64006 |
| 0.3  | 2   | 0     | 46.72 | 0    | 46.74064 | 1.866885 | 0.217904 | 0.388073 | 53.25936 |

Prepared for submission to Materials (Supplementary Information)

|     |     |       |       |      |          |          |          |          |          |
|-----|-----|-------|-------|------|----------|----------|----------|----------|----------|
| 0.3 | 3   | 0     | 44.77 | 0    | 44.76348 | 3.811354 | 0.43852  | 0.773988 | 55.23652 |
| 0.3 | 4   | 0     | 44.4  | 0    | 44.39658 | 4.172184 | 0.479459 | 0.845601 | 55.60342 |
| 0.3 | 5   | 0     | 41.95 | 0.9  | 41.96447 | 6.564084 | 0.750839 | 1.320316 | 58.03553 |
| 0.3 | 6   | 0     | 32.9  | 7.5  | 32.87214 | 15.50606 | 1.76538  | 3.09501  | 67.12786 |
| 0.3 | 7   | 0     | 27.79 | 20   | 27.7833  | 20.51076 | 2.333204 | 4.088282 | 72.2167  |
| 0.3 | 8   | 0     | 20.04 | 35.3 | 20.06343 | 28.10298 | 3.194603 | 5.595092 | 79.93657 |
| 0.3 | 9   | 0     | 17.91 | 48.7 | 17.92422 | 30.20681 | 3.4333   | 6.012635 | 82.07578 |
| 0.3 | 24  | 0     | 11.82 | 66.9 | 11.79077 | 36.23885 | 4.117684 | 7.209799 | 88.20923 |
| 0.3 | 72  | 0     | 10.16 | 75.1 | 10.19125 | 37.81193 | 4.296162 | 7.522004 | 89.80875 |
| 0.3 | 168 | 0     | 10.04 | 75.8 | 10.06266 | 37.93839 | 4.31051  | 7.547102 | 89.93734 |
| 0.3 | 1   | 0.001 | 44.05 | 0    | 44.08143 | 4.482126 | 0.514624 | 0.907114 | 55.91857 |
| 0.3 | 2   | 0.001 | 42.03 | 0    | 42.01773 | 6.5117   | 0.744896 | 1.309919 | 57.98227 |
| 0.3 | 3   | 0.001 | 38.81 | 0.5  | 38.79045 | 9.685612 | 1.105002 | 1.939838 | 61.20955 |
| 0.3 | 4   | 0.001 | 26.08 | 2.3  | 26.09127 | 22.17481 | 2.522003 | 4.418541 | 73.90873 |
| 0.3 | 5   | 0.001 | 25.77 | 7.8  | 25.79783 | 22.4634  | 2.554747 | 4.475817 | 74.20217 |
| 0.3 | 6   | 0.001 | 21.66 | 11.3 | 21.63556 | 26.55685 | 3.019182 | 5.288235 | 78.36444 |
| 0.3 | 24  | 0.001 | 15.13 | 47.3 | 15.13451 | 32.9504  | 3.744582 | 6.557148 | 84.86549 |
| 0.3 | 72  | 0.001 | 12.26 | 57.5 | 12.23606 | 35.80093 | 4.067998 | 7.122886 | 87.76394 |
| 0.3 | 168 | 0.001 | 5.72  | 68.6 | 5.700422 | 42.22849 | 4.797257 | 8.39855  | 94.29958 |
| 0.3 | 1   | 0.003 | 44.29 | 0    | 44.2916  | 4.27543  | 0.491173 | 0.866092 | 55.7084  |
| 0.3 | 2   | 0.003 | 37.99 | 0.7  | 37.97353 | 10.48903 | 1.196156 | 2.099291 | 62.02647 |
| 0.3 | 3   | 0.003 | 32.52 | 4.9  | 32.53391 | 15.8387  | 1.803121 | 3.161029 | 67.46609 |
| 0.3 | 4   | 0.003 | 25.03 | 11   | 25.03248 | 23.21609 | 2.640145 | 4.625202 | 74.96752 |
| 0.3 | 5   | 0.003 | 21.3  | 30.3 | 21.27403 | 26.9124  | 3.059521 | 5.358799 | 78.72597 |
| 0.3 | 6   | 0.003 | 19.6  | 36.7 | 19.5768  | 28.58157 | 3.248902 | 5.690076 | 80.4232  |
| 0.3 | 24  | 0.003 | 18.23 | 42.2 | 18.23145 | 29.90467 | 3.399019 | 5.952669 | 81.76855 |
| 0.3 | 72  | 0.003 | 11.39 | 62.5 | 11.4082  | 36.61509 | 4.160371 | 7.284471 | 88.5918  |
| 0.3 | 168 | 0.003 | 11.12 | 68.4 | 11.08876 | 36.92925 | 4.196015 | 7.346822 | 88.91124 |
| 0.3 | 1   | 0.005 | 42.34 | 0.2  | 42.33695 | 6.19776  | 0.709277 | 1.247612 | 57.66305 |
| 0.3 | 2   | 0.005 | 37.68 | 3.1  | 37.64561 | 10.81152 | 1.232746 | 2.163295 | 62.35439 |
| 0.3 | 3   | 0.005 | 27.62 | 21.2 | 27.60904 | 20.68213 | 2.352647 | 4.122293 | 72.39096 |
| 0.3 | 4   | 0.005 | 22.37 | 32.2 | 22.35633 | 25.848   | 2.938756 | 5.14755  | 77.64367 |
| 0.3 | 5   | 0.005 | 21.16 | 35   | 21.15335 | 27.03108 | 3.072987 | 5.382354 | 78.84665 |
| 0.3 | 6   | 0.005 | 18.16 | 40   | 18.17005 | 29.96506 | 3.40587  | 5.964654 | 81.82995 |
| 0.3 | 24  | 0.005 | 16.14 | 46.7 | 16.13153 | 31.96986 | 3.633332 | 6.362543 | 83.86847 |
| 0.3 | 72  | 0.005 | 16    | 48.8 | 16.00722 | 32.09212 | 3.647204 | 6.386808 | 83.99278 |
| 0.3 | 168 | 0.005 | 8.29  | 65.9 | 8.252586 | 39.71853 | 4.512482 | 7.900403 | 91.74741 |
| 0.3 | 1   | 0.007 | 42.19 | 0.5  | 42.17742 | 6.354653 | 0.727078 | 1.27875  | 57.82258 |
| 0.3 | 2   | 0.007 | 38.12 | 4.2  | 38.13724 | 10.32802 | 1.177889 | 2.067336 | 61.86276 |
| 0.3 | 3   | 0.007 | 24.71 | 19   | 24.67808 | 23.56463 | 2.679691 | 4.694376 | 75.32192 |
| 0.3 | 4   | 0.007 | 23.56 | 22.2 | 23.55092 | 24.67316 | 2.805462 | 4.914383 | 76.44908 |

Prepared for submission to Materials (Supplementary Information)

|     |     |       |       |      |          |          |          |          |          |
|-----|-----|-------|-------|------|----------|----------|----------|----------|----------|
| 0.3 | 5   | 0.007 | 22.32 | 33.9 | 22.29638 | 25.90695 | 2.945446 | 5.159251 | 77.70362 |
| 0.3 | 6   | 0.007 | 22.2  | 36.8 | 22.23641 | 25.96593 | 2.952137 | 5.170956 | 77.76359 |
| 0.3 | 24  | 0.007 | 16.36 | 54.1 | 16.31784 | 31.78663 | 3.612543 | 6.326178 | 83.68216 |
| 0.3 | 72  | 0.007 | 12.99 | 67.9 | 12.9968  | 35.05277 | 3.983113 | 6.9744   | 87.0032  |
| 0.3 | 168 | 0.007 | 9.14  | 71.2 | 9.095267 | 38.88978 | 4.418453 | 7.735924 | 90.90473 |
| 0.3 | 1   | 0.01  | 41.98 | 1.2  | 41.91118 | 6.616485 | 0.756785 | 1.330716 | 58.08882 |
| 0.3 | 2   | 0.01  | 32.87 | 7.8  | 32.92845 | 15.45069 | 1.759097 | 3.08402  | 67.07155 |
| 0.3 | 3   | 0.01  | 21.93 | 31.7 | 21.93625 | 26.26113 | 2.98563  | 5.229544 | 78.06375 |
| 0.3 | 4   | 0.01  | 17.75 | 38.7 | 17.73963 | 30.38836 | 3.453897 | 6.048665 | 82.26037 |
| 0.3 | 5   | 0.01  | 15.88 | 51.9 | 15.88281 | 32.21447 | 3.661085 | 6.41109  | 84.11719 |
| 0.3 | 6   | 0.01  | 14.64 | 58.6 | 14.63386 | 33.44277 | 3.800446 | 6.654868 | 85.36614 |
| 0.3 | 24  | 0.01  | 12.97 | 69.7 | 12.93353 | 35.11499 | 3.990173 | 6.986749 | 87.06647 |
| 0.3 | 72  | 0.01  | 11.63 | 70.1 | 11.59959 | 36.42687 | 4.139016 | 7.247115 | 88.40041 |
| 0.3 | 168 | 0.01  | 8.18  | 79.8 | 8.187599 | 39.78244 | 4.519733 | 7.913088 | 91.8124  |
